# Supplementary material for: Candidate silencer elements for the human and mouse genomes
Source: PubMed Central journal article supplement (PMC7044160; doi:10.1038/s41467-020-14853-5), 2020-02-26
Supplement: 41467_2020_14853_MOESM3_ESM.pdf [file 41467_2020_14853_MOESM3_ESM.pdf]

## **Description of Additional Supplementary Files**

File Name: Supplementary Data 1

Description: Overview of cell types and count of uncharacterized CREs per cell type

File Name: Supplementary Data 2

Description: MPRA tested uncharacterized cis-regulatory elements along with control elements and their activity levels

File Name: Supplementary Data 3

Description: Reporter assays testing silencer elements along with control elements and their activity levels

File Name: Supplementary Data 4

Description: Primer and gblock sequences used in CRISPR-Cas9 experiments

File Name: Supplementary Data 5

Description: SVM model identified candidate silencer elements
